# Supplementary material for: Effect of the Rearing Substrate on Total Protein and Amino Acid Composition in Black Soldier Fly
Source: MDPI journal article supplement (doi:10.3390/foods10081773), 2021-07-30
Supplement: s1 [file s1]

**Table S1:** Formulation and proximate composition of the rearing substrates, and total weight of corresponding prepupae biomass

| REARING SUBSTRATES FORMULATION |                   |                   |               |               |           |           |            |            |            |            | PROXIMATE COMPOSITION OF REARING SUBSTRATES FORMULATED |              |                    |                    |                  |                   |                                 | Total prepupae biomass (g)      |       |
|--------------------------------|-------------------|-------------------|---------------|---------------|-----------|-----------|------------|------------|------------|------------|--------------------------------------------------------|--------------|--------------------|--------------------|------------------|-------------------|---------------------------------|---------------------------------|-------|
| Entomology code                | Exotic fruits (%) | Pineapple (%)     | Kiwifruit (%) | Apple (%)     | Melon (%) | Peach (%) | Tomato (%) | Legume (%) | Corn (%)   | Pomace (%) | Humidity (%)                                           | Lipid (%)    | Cru de protein (%) | Ash (%)            | Polyp henols (%) | Dietary fibre (%) | Non-structural carbohydrate (%) |                                 |       |
| All-Year group                 | A                 | 50                | 0             | 0             | 0         | 50        | /          | /          | /          | /          | /                                                      | 87,51        | 0,08               | 0,60               | 0,60             | 0,01              | 3,83                            | 7,72                            | 26,25 |
|                                | B                 | 10                | 10            | 60            | 10        | 10        | /          | /          | /          | /          | /                                                      | 87,76        | 0,07               | 0,77               | 1,25             | 0,00              | 2,43                            | 7,79                            | 19,47 |
|                                | C                 | 0                 | 100           | 0             | 0         | 0         | /          | /          | /          | /          | /                                                      | 86,51        | 0,21               | 0,52               | 0,62             | 0,00              | 0,75                            | 11,39                           | 17,15 |
|                                | D                 | 0                 | 0             | 0             | 0         | 100       | /          | /          | /          | /          | /                                                      | 93,78        | 0,08               | 0,48               | 0,71             | 0,00              | 5,61                            | 0,00                            | 22,54 |
|                                | E                 | 0                 | 0             | 0             | 100       | 0         | /          | /          | /          | /          | /                                                      | 90,83        | 0,04               | 0,35               | 0,32             | 0,00              | 1,54                            | 6,92                            | 20,4  |
|                                | F                 | 100               | 0             | 0             | 0         | 0         | /          | /          | /          | /          | /                                                      | 81,23        | 0,08               | 0,72               | 0,48             | 0,01              | 2,04                            | 15,44                           | 18,31 |
|                                | G                 | 20                | 20            | 20            | 20        | 20        | /          | /          | /          | /          | /                                                      | 87,98        | 0,09               | 0,60               | 0,77             | 0,00              | 2,47                            | 8,22                            | 23,51 |
|                                | H                 | 50                | 0             | 50            | 0         | 0         | /          | /          | /          | /          | /                                                      | 84,39        | 0,07               | 0,83               | 1,11             | 0,01              | 2,22                            | 11,40                           | 20,83 |
|                                | J                 | 0                 | 50            | 0             | 0         | 50        | /          | /          | /          | /          | /                                                      | 90,15        | 0,15               | 0,50               | 0,67             | 0,00              | 3,18                            | 5,70                            | 23,44 |
|                                | L                 | 0                 | 0             | 50            | 0         | 50        | /          | /          | /          | /          | /                                                      | 90,66        | 0,07               | 0,71               | 1,22             | 0,00              | 4,00                            | 3,68                            | 20,93 |
|                                | N                 | 0                 | 50            | 0             | 50        | 0         | /          | /          | /          | /          | /                                                      | 88,67        | 0,13               | 0,44               | 0,47             | 0,00              | 1,15                            | 9,16                            | 22,32 |
|                                | P                 | 10                | 10            | 10            | 60        | 10        | /          | /          | /          | /          | /                                                      | 89,40        | 0,07               | 0,48               | 0,55             | 0,00              | 2,00                            | 7,57                            | 22,77 |
|                                | Q                 | 0                 | 0             | 0             | 50        | 50        | /          | /          | /          | /          | /                                                      | 92,31        | 0,06               | 0,42               | 0,52             | 0,00              | 3,58                            | 3,46                            | 24,57 |
|                                | R                 | 10                | 10            | 10            | 10        | 60        | /          | /          | /          | /          | /                                                      | 90,88        | 0,09               | 0,54               | 0,74             | 0,00              | 4,04                            | 4,11                            | 25,34 |
|                                | S                 | 0                 | 50            | 50            | 0         | 0         | /          | /          | /          | /          | /                                                      | 87,03        | 0,13               | 0,73               | 1,18             | 0,00              | 1,57                            | 9,38                            | 19,66 |
|                                | T                 | 50                | 50            | 0             | 0         | 0         | /          | /          | /          | /          | /                                                      | 83,87        | 0,15               | 0,62               | 0,55             | 0,01              | 1,40                            | 13,42                           | 20,69 |
|                                | U                 | 0                 | 0             | 100           | 0         | 0         | /          | /          | /          | /          | /                                                      | 87,54        | 0,05               | 0,94               | 1,73             | 0,00              | 2,39                            | 7,36                            | 13,06 |
|                                | V                 | 50                | 0             | 0             | 50        | 0         | /          | /          | /          | /          | /                                                      | 86,03        | 0,06               | 0,54               | 0,40             | 0,01              | 1,79                            | 11,18                           | 22,07 |
|                                | X                 | 60                | 10            | 10            | 10        | 10        | /          | /          | /          | /          | /                                                      | 84,60        | 0,09               | 0,66               | 0,63             | 0,01              | 2,25                            | 11,83                           | 22,59 |
|                                | Y                 | 10                | 60            | 10            | 10        | 10        | /          | /          | /          | /          | /                                                      | 87,24        | 0,15               | 0,56               | 0,70             | 0,00              | 1,61                            | 9,81                            | 20,6  |
| Z                              | 0                 | 0                 | 50            | 50            | 0         | /         | /          | /          | /          | /          | 89,19                                                  | 0,05         | 0,65               | 1,03               | 0,00             | 1,97              | 7,14                            | 19,59                           |       |
| Summer group                   | Entomology code   | Exotic fruits (%) | Pineapple (%) | Kiwifruit (%) | Apple (%) | Melon (%) | Peach (%)  | Tomato (%) | Legume (%) | Corn (%)   | Pomace (%)                                             | Humidity (%) | Lipid (%)          | Cru de protein (%) | Ash (%)          | Polyp henols (%)  | Dietary fibre (%)               | Non-structural carbohydrate (%) |       |
|                                | A                 | 0                 | /             | /             | /         | 0         | 67         | 33         | /          | /          | /                                                      | 86,48        | 0,67               | 1,59               | 0,62             | 0,02              | 8,13                            | 2,87                            | 39,54 |
|                                | B                 | 0                 | /             | /             | /         | 0         | 100        | 0          | /          | /          | /                                                      | 89,89        | 0,82               | 0,87               | 0,52             | 0,01              | 3,58                            | 4,30                            | 36,69 |
|                                | C                 | 20                | /             | /             | /         | 47        | 16         | 17         | /          | /          | /                                                      | 88,27        | 0,25               | 1,01               | 0,65             | 0,01              | 6,49                            | 3,81                            | 36,9  |
|                                | D                 | 10                | /             | /             | /         | 24        | 33         | 33         | /          | /          | /                                                      | 86,53        | 0,43               | 1,48               | 0,66             | 0,01              | 8,45                            | 2,98                            | 39,45 |
|                                | E                 | 10                | /             | /             | /         | 23        | 0          | 67         | /          | /          | /                                                      | 83,12        | 0,28               | 2,20               | 0,76             | 0,02              | 13,00                           | 1,54                            | 42,42 |
|                                | F                 | 20                | /             | /             | /         | 47        | 33         | 0          | /          | /          | /                                                      | 89,97        | 0,33               | 0,66               | 0,60             | 0,01              | 4,22                            | 4,52                            | 36,33 |

|              |   |                 |                   |               |               |           |           |           |            |            |          |            |              |           |                    |         |                |                   |                                 |
|--------------|---|-----------------|-------------------|---------------|---------------|-----------|-----------|-----------|------------|------------|----------|------------|--------------|-----------|--------------------|---------|----------------|-------------------|---------------------------------|
|              | G | 5               | /                 | /             | /             | 12        | 67        | 16        | /          | /          | /        | 88,21      | 0,62         | 1,18      | 0,59               | 0,01    | 6,01           | 3,64              | 37,21                           |
|              | H | 20              | /                 | /             | /             | 47        | 0         | 33        | /          | /          | /        | 86,57      | 0,18         | 1,37      | 0,70               | 0,01    | 8,77           | 3,09              | 36,37                           |
|              | I | 30              | /                 | /             | /             | 70        | 0         | 0         | /          | /          | /        | 90,02      | 0,08         | 0,55      | 0,64               | 0,00    | 4,54           | 4,63              | 35,01                           |
|              | J | 0               | /                 | /             | /             | 0         | 33        | 67        | /          | /          | /        | 83,08      | 0,52         | 2,31      | 0,72               | 0,02    | 12,68          | 1,43              | 41,89                           |
|              | K | 5               | /                 | /             | /             | 11        | 17        | 67        | /          | /          | /        | 83,10      | 0,40         | 2,25      | 0,74               | 0,02    | 12,84          | 1,49              | 41,01                           |
|              | L | 0               | /                 | /             | /             | 0         | 0         | 100       | /          | /          | /        | 79,68      | 0,37         | 3,02      | 0,82               | 0,02    | 17,23          | 0,00              | 50,46                           |
|              | M | 10              | /                 | /             | /             | 23        | 67        | 0         | /          | /          | /        | 89,93      | 0,58         | 0,76      | 0,56               | 0,01    | 3,90           | 4,41              | 39,52                           |
|              |   | Entomology code | Exotic fruits (%) | Pineapple (%) | Kiwifruit (%) | Apple (%) | Melon (%) | Peach (%) | Tomato (%) | Legume (%) | Corn (%) | Pomace (%) | Humidity (%) | Lipid (%) | Cru de protein (%) | Asn (%) | Polypheols (%) | Dietary fibre (%) | Non-structural carbohydrate (%) |
| Autumn group | A | 4               | /                 | /             | /             | 8,5       | /         | /         | 12,5       | 62,5       | 12,5     | 60,37      | 1,23         | 8,51      | 1,06               | 0,01    | 26,47          | 2,40              | 62,88                           |
|              | B | 15              | /                 | /             | /             | 35        | /         | /         | 0          | 50         | 0        | 71,11      | 0,76         | 6,02      | 0,80               | 0,01    | 19,06          | 2,47              | 67,4                            |
|              | C | 0               | /                 | /             | /             | 0         | /         | /         | 0          | 100        | 0        | 52,20      | 1,44         | 11,49     | 0,97               | 0,01    | 33,59          | 0,30              | 51,47                           |
|              | D | 4               | /                 | /             | /             | 8,5       | /         | /         | 12,5       | 12,5       | 62,5     | 69,94      | 1,43         | 3,49      | 1,57               | 0,01    | 18,01          | 5,60              | 52,14                           |
|              | E | 4               | /                 | /             | /             | 8,5       | /         | /         | 62,5       | 12,5       | 12,5     | 64,59      | 0,86         | 7,09      | 1,11               | 0,01    | 20,99          | 5,41              | 60,95                           |
|              | F | 0               | /                 | /             | /             | 0         | /         | /         | 100        | 0          | 0        | 60,63      | 0,70         | 8,65      | 1,05               | 0,01    | 22,63          | 6,33              | 48,08                           |
|              | G | 0               | /                 | /             | /             | 0         | /         | /         | 50         | 0          | 50       | 65,98      | 1,28         | 5,05      | 1,52               | 0,01    | 19,64          | 6,52              | 55,75                           |
|              | H | 30              | /                 | /             | /             | 70        | /         | /         | 0          | 0          | 0        | 90,02      | 0,08         | 0,55      | 0,64               | 0,00    | 4,54           | 4,63              | 40,60                           |
|              | I | 0               | /                 | /             | /             | 0         | /         | /         | 50         | 50         | 0        | 56,42      | 1,07         | 10,07     | 1,01               | 0,01    | 28,11          | 3,32              | 54,33                           |
|              | J | 15              | /                 | /             | /             | 35        | /         | /         | 0          | 0          | 50       | 80,67      | 0,96         | 1,00      | 1,31               | 0,01    | 10,60          | 5,67              | 40,64                           |
|              | K | 19              | /                 | /             | /             | 43,5      | /         | /         | 12,5       | 12,5       | 12,5     | 79,28      | 0,55         | 3,04      | 0,90               | 0,01    | 11,95          | 4,56              | 55,55                           |
|              | L | 0               | /                 | /             | /             | 0         | /         | /         | 0          | 0          | 100      | 71,33      | 1,85         | 1,45      | 1,98               | 0,02    | 16,66          | 6,71              | 18,46                           |
|              | M | 0               | /                 | /             | /             | 0         | /         | /         | 0          | 50         | 50       | 61,76      | 1,64         | 6,47      | 1,47               | 0,01    | 25,13          | 3,51              | 58,68                           |
|              | N | 15              | /                 | /             | /             | 35        | /         | /         | 50         | 0          | 0        | 75,32      | 0,39         | 4,60      | 0,85               | 0,01    | 13,58          | 5,48              | 56,91                           |
|              | O | 7,5             | /                 | /             | /             | 17,5      | /         | /         | 25         | 25         | 25       | 68,54      | 1,02         | 5,53      | 1,16               | 0,01    | 19,35          | 4,49              | 65,64                           |

**Table S2:** Complete amino acid composition (mg AA/g protein) of BSF prepupae grown on different diets

|                        |   | mg AA/g protein |              |            |            |            |            |            |            |            |            |           |            |            |            |            |              |            |            |
|------------------------|---|-----------------|--------------|------------|------------|------------|------------|------------|------------|------------|------------|-----------|------------|------------|------------|------------|--------------|------------|------------|
|                        |   | ala             | asp +<br>asn | arg        | gly        | his        | ile        | leu        | me<br>t    | phe        | pro        | ser       | thr        | val        | lys        | tyr        | glu +<br>gln | trp        | cys        |
| Code                   |   |                 |              |            |            |            |            |            |            |            |            |           |            |            |            |            |              |            |            |
| ALL-YEAR GROUP         | A | 65 ±<br>6       | 113 ±<br>14  | 69 ±<br>8  | 60 ±<br>7  | 23 ±<br>16 | 42 ±<br>±2 | 67 ±<br>±2 | 19 ±<br>±1 | 42 ±<br>7  | 72 ±<br>±8 | 53 ±<br>2 | 41 ±<br>±0 | 60 ±<br>±2 | 60 ±<br>13 | 61 ±<br>14 | 124 ±<br>1   | 14 ±<br>±2 | 14 ±<br>±0 |
|                        | B | 62 ±<br>7       | 114 ±<br>16  | 71 ±<br>18 | 50 ±<br>0  | 33 ±<br>5  | 42 ±<br>±1 | 70 ±<br>±0 | 19 ±<br>±0 | 37 ±<br>5  | 73 ±<br>±5 | 48 ±<br>1 | 40 ±<br>±2 | 60 ±<br>±1 | 59 ±<br>8  | 56 ±<br>7  | 131 ±<br>18  | 18 ±<br>±1 | 18 ±<br>±0 |
|                        | C | 62 ±<br>2       | 92 ±<br>19   | 80 ±<br>7  | 57 ±<br>7  | 37 ±<br>13 | 43 ±<br>±2 | 69 ±<br>±4 | 19 ±<br>±0 | 48 ±<br>12 | 69 ±<br>±2 | 50 ±<br>3 | 41 ±<br>±3 | 60 ±<br>±1 | 59 ±<br>15 | 73 ±<br>16 | 108 ±<br>19  | 16 ±<br>±3 | 17 ±<br>±2 |
|                        | D | 63 ±<br>2       | 106 ±<br>2   | 72 ±<br>10 | 56 ±<br>0  | 30 ±<br>1  | 42 ±<br>±1 | 70 ±<br>±0 | 22 ±<br>±2 | 49 ±<br>0  | 68 ±<br>±4 | 49 ±<br>0 | 41 ±<br>±1 | 61 ±<br>±1 | 57 ±<br>8  | 69 ±<br>11 | 109 ±<br>8   | 17 ±<br>±0 | 17 ±<br>±1 |
|                        | E | 65 ±<br>3       | 118 ±<br>5   | 71 ±<br>12 | 51 ±<br>3  | 36 ±<br>5  | 41 ±<br>±2 | 69 ±<br>±1 | 17 ±<br>±1 | 38 ±<br>1  | 70 ±<br>±4 | 47 ±<br>2 | 39 ±<br>±4 | 59 ±<br>±3 | 61 ±<br>2  | 59 ±<br>3  | 126 ±<br>2   | 15 ±<br>±1 | 19 ±<br>±2 |
|                        | F | 65 ±<br>2       | 111 ±<br>9   | 70 ±<br>5  | 51 ±<br>1  | 35 ±<br>5  | 45 ±<br>±1 | 72 ±<br>±4 | 18 ±<br>±1 | 39 ±<br>2  | 72 ±<br>±1 | 49 ±<br>3 | 38 ±<br>±0 | 60 ±<br>±3 | 64 ±<br>8  | 58 ±<br>0  | 120 ±<br>0   | 14 ±<br>±0 | 17 ±<br>±2 |
|                        | G | 72 ±<br>12      | 107 ±<br>18  | 63 ±<br>2  | 54 ±<br>7  | 27 ±<br>4  | 46 ±<br>±5 | 75 ±<br>±9 | 17 ±<br>±0 | 40 ±<br>1  | 71 ±<br>±3 | 46 ±<br>6 | 36 ±<br>±8 | 66 ±<br>±4 | 70 ±<br>8  | 51 ±<br>10 | 128 ±<br>7   | 14 ±<br>±1 | 16 ±<br>±0 |
|                        | H | 61 ±<br>4       | 105 ±<br>6   | 78 ±<br>1  | 53 ±<br>2  | 33 ±<br>0  | 43 ±<br>±2 | 71 ±<br>±2 | 18 ±<br>±1 | 43 ±<br>1  | 69 ±<br>±3 | 50 ±<br>2 | 38 ±<br>±1 | 60 ±<br>±1 | 63 ±<br>1  | 61 ±<br>4  | 121 ±<br>4   | 15 ±<br>±1 | 19 ±<br>±3 |
|                        | J | 64 ±<br>3       | 103 ±<br>8   | 75 ±<br>3  | 54 ±<br>10 | 37 ±<br>2  | 43 ±<br>±2 | 72 ±<br>±1 | 18 ±<br>±5 | 42 ±<br>6  | 72 ±<br>±2 | 56 ±<br>7 | 38 ±<br>±0 | 60 ±<br>±3 | 59 ±<br>15 | 66 ±<br>13 | 117 ±<br>16  | 7 ±<br>1   | 16 ±<br>±2 |
|                        | L | 66 ±<br>3       | 115 ±<br>2   | 74 ±<br>4  | 54 ±<br>9  | 34 ±<br>5  | 39 ±<br>±3 | 71 ±<br>±3 | 16 ±<br>±1 | 35 ±<br>3  | 72 ±<br>±3 | 47 ±<br>2 | 35 ±<br>±2 | 59 ±<br>±5 | 64 ±<br>17 | 56 ±<br>9  | 128 ±<br>8   | 15 ±<br>±1 | 20 ±<br>±1 |
|                        | N | 67 ±<br>3       | 110 ±<br>5   | 73 ±<br>2  | 47 ±<br>1  | 31 ±<br>3  | 45 ±<br>±4 | 73 ±<br>±6 | 16 ±<br>±0 | 39 ±<br>5  | 71 ±<br>±1 | 47 ±<br>1 | 38 ±<br>±1 | 63 ±<br>±4 | 72 ±<br>3  | 53 ±<br>1  | 129 ±<br>14  | 12 ±<br>±2 | 16 ±<br>±4 |
|                        | P | 66 ±<br>2       | 109 ±<br>7   | 71 ±<br>7  | 50 ±<br>2  | 33 ±<br>3  | 44 ±<br>±1 | 71 ±<br>±0 | 20 ±<br>±1 | 42 ±<br>3  | 68 ±<br>±3 | 50 ±<br>0 | 42 ±<br>±2 | 63 ±<br>±1 | 60 ±<br>6  | 62 ±<br>1  | 116 ±<br>5   | 17 ±<br>±2 | 15 ±<br>±3 |
|                        | Q | 63 ±<br>3       | 106 ±<br>3   | 78 ±<br>6  | 50 ±<br>3  | 37 ±<br>5  | 43 ±<br>±1 | 73 ±<br>±3 | 21 ±<br>±1 | 41 ±<br>1  | 64 ±<br>±0 | 50 ±<br>2 | 40 ±<br>±0 | 60 ±<br>±0 | 60 ±<br>4  | 59 ±<br>3  | 118 ±<br>4   | 19 ±<br>±1 | 19 ±<br>±2 |
|                        | R | 64 ±<br>4       | 106 ±<br>3   | 77 ±<br>2  | 50 ±<br>3  | 33 ±<br>5  | 41 ±<br>±2 | 72 ±<br>±2 | 18 ±<br>±0 | 42 ±<br>2  | 68 ±<br>±4 | 49 ±<br>3 | 40 ±<br>±0 | 58 ±<br>±0 | 65 ±<br>2  | 63 ±<br>5  | 119 ±<br>1   | 15 ±<br>±1 | 21 ±<br>±3 |
|                        | S | 64 ±<br>4       | 108 ±<br>1   | 74 ±<br>5  | 51 ±<br>3  | 33 ±<br>0  | 42 ±<br>±1 | 71 ±<br>±3 | 17 ±<br>±2 | 42 ±<br>1  | 68 ±<br>±4 | 49 ±<br>3 | 40 ±<br>±1 | 59 ±<br>±2 | 61 ±<br>10 | 63 ±<br>1  | 119 ±<br>1   | 16 ±<br>±0 | 22 ±<br>±0 |
|                        | T | 65 ±<br>1       | 111 ±<br>6   | 73 ±<br>0  | 51 ±<br>2  | 35 ±<br>1  | 43 ±<br>±1 | 71 ±<br>±0 | 18 ±<br>±1 | 41 ±<br>2  | 64 ±<br>±1 | 48 ±<br>2 | 41 ±<br>±1 | 62 ±<br>±1 | 64 ±<br>8  | 63 ±<br>3  | 116 ±<br>7   | 14 ±<br>±0 | 20 ±<br>±3 |
|                        | U | 62 ±<br>2       | 100 ±<br>5   | 68 ±<br>2  | 50 ±<br>5  | 31 ±<br>3  | 44 ±<br>±0 | 73 ±<br>±2 | 19 ±<br>±2 | 45 ±<br>11 | 72 ±<br>±2 | 53 ±<br>3 | 42 ±<br>±1 | 61 ±<br>±1 | 61 ±<br>17 | 63 ±<br>15 | 125 ±<br>12  | 12 ±<br>±0 | 20 ±<br>±1 |
|                        | V | 61 ±<br>1       | 105 ±<br>9   | 79 ±<br>3  | 48 ±<br>1  | 38 ±<br>1  | 42 ±<br>±1 | 71 ±<br>±0 | 19 ±<br>±0 | 42 ±<br>1  | 67 ±<br>±4 | 51 ±<br>4 | 40 ±<br>±0 | 57 ±<br>±0 | 62 ±<br>3  | 60 ±<br>2  | 122 ±<br>7   | 16 ±<br>±2 | 19 ±<br>±1 |
|                        | X | 60 ±<br>2       | 101 ±<br>15  | 82 ±<br>6  | 51 ±<br>6  | 36 ±<br>2  | 44 ±<br>±3 | 72 ±<br>±1 | 19 ±<br>±1 | 47 ±<br>5  | 67 ±<br>±3 | 47 ±<br>2 | 39 ±<br>±0 | 61 ±<br>±4 | 55 ±<br>8  | 70 ±<br>11 | 110 ±<br>0   | 18 ±<br>±4 | 20 ±<br>±2 |
|                        | Y | 61 ±<br>6       | 105 ±<br>12  | 80 ±<br>1  | 49 ±<br>2  | 38 ±<br>7  | 44 ±<br>±1 | 72 ±<br>±1 | 18 ±<br>±2 | 42 ±<br>7  | 68 ±<br>±4 | 49 ±<br>2 | 40 ±<br>±2 | 61 ±<br>±1 | 62 ±<br>12 | 66 ±<br>9  | 114 ±<br>9   | 12 ±<br>±1 | 17 ±<br>±2 |
|                        | Z | 63 ±<br>4       | 104 ±<br>8   | 77 ±<br>6  | 48 ±<br>3  | 33 ±<br>5  | 43 ±<br>±3 | 72 ±<br>±0 | 18 ±<br>±0 | 38 ±<br>5  | 71 ±<br>±0 | 50 ±<br>4 | 39 ±<br>±5 | 60 ±<br>±4 | 69 ±<br>3  | 55 ±<br>7  | 125 ±<br>5   | 14 ±<br>±1 | 21 ±<br>±2 |
|                        |   | ala             | asp +<br>asn | arg        | gly        | his        | ile        | leu        | me<br>t    | phe        | pro        | ser       | thr        | val        | lys        | tyr        | glu +<br>gln | trp        | cys        |
| Entomo<br>logy<br>code |   |                 |              |            |            |            |            |            |            |            |            |           |            |            |            |            |              |            |            |
| SUM                    | A | 64 ±<br>3       | 96 ±<br>1    | 76 ±<br>6  | 48 ±<br>3  | 41 ±<br>2  | 44 ±<br>±1 | 75 ±<br>±1 | 18 ±<br>±1 | 42 ±<br>5  | 70 ±<br>±0 | 46 ±<br>2 | 36 ±<br>±2 | 59 ±<br>±2 | 66 ±<br>11 | 62 ±<br>4  | 118 ±<br>3   | 19 ±<br>±1 | 20 ±<br>±2 |

|              |                        |        |         |           |        |        |        |        |        |        |        |         |        |        |         |         |          |           |        |
|--------------|------------------------|--------|---------|-----------|--------|--------|--------|--------|--------|--------|--------|---------|--------|--------|---------|---------|----------|-----------|--------|
|              | B                      | 67 ± 3 | 91 ± 3  | 77 ± 2    | 47 ± 1 | 41 ± 2 | 46 ± 0 | 84 ± 8 | 15 ± 2 | 38 ± 3 | 71 ± 4 | 44 ± 0  | 33 ± 1 | 60 ± 2 | 63 ± 4  | 61 ± 0  | 122 ± 1  | 17 ± 3    | 24 ± 5 |
|              | C                      | 65 ± 2 | 97 ± 1  | 84 ± 2    | 47 ± 2 | 38 ± 0 | 44 ± 4 | 80 ± 1 | 17 ± 1 | 40 ± 3 | 68 ± 1 | 45 ± 0  | 35 ± 0 | 59 ± 1 | 66 ± 5  | 61 ± 5  | 115 ± 1  | 19 ± 5    | 22 ± 0 |
|              | D                      | 62 ± 3 | 101 ± 5 | 73 ± 8    | 50 ± 3 | 41 ± 2 | 44 ± 2 | 79 ± 4 | 19 ± 1 | 40 ± 0 | 66 ± 2 | 45 ± 2  | 38 ± 5 | 60 ± 2 | 67 ± 9  | 61 ± 1  | 120 ± 2  | 15 ± 3    | 19 ± 3 |
|              | E                      | 64 ± 2 | 103 ± 1 | 73 ± 1    | 47 ± 3 | 38 ± 0 | 43 ± 3 | 77 ± 2 | 18 ± 1 | 41 ± 0 | 70 ± 6 | 45 ± 3  | 38 ± 2 | 62 ± 2 | 64 ± 7  | 61 ± 2  | 122 ± 4  | 14 ± 0    | 19 ± 1 |
|              | F                      | 66 ± 2 | 94 ± 1  | 73 ± 7    | 51 ± 2 | 46 ± 0 | 41 ± 1 | 75 ± 1 | 18 ± 0 | 42 ± 1 | 73 ± 2 | 47 ± 1  | 39 ± 1 | 57 ± 0 | 57 ± 2  | 64 ± 4  | 117 ± 6  | 16 ± 1    | 23 ± 2 |
|              | G                      | 65 ± 3 | 94 ± 8  | 77 ± 5    | 52 ± 3 | 39 ± 3 | 41 ± 0 | 76 ± 1 | 17 ± 3 | 45 ± 7 | 71 ± 2 | 50 ± 2  | 40 ± 1 | 56 ± 2 | 54 ± 4  | 75 ± 12 | 114 ± 9  | 13 ± 1    | 22 ± 3 |
|              | H                      | 66 ± 1 | 107 ± 4 | 75 ± 5    | 46 ± 3 | 31 ± 6 | 43 ± 1 | 76 ± 1 | 18 ± 1 | 39 ± 3 | 70 ± 2 | 46 ± 2  | 37 ± 0 | 58 ± 0 | 61 ± 12 | 62 ± 4  | 124 ± 2  | 17 ± 3    | 23 ± 2 |
|              | I                      | 62 ± 2 | 100 ± 2 | 71 ± 8    | 45 ± 2 | 38 ± 8 | 41 ± 3 | 76 ± 3 | 18 ± 2 | 41 ± 3 | 69 ± 1 | 46 ± 4  | 40 ± 4 | 62 ± 2 | 67 ± 3  | 63 ± 0  | 127 ± 6  | 15 ± 3    | 19 ± 1 |
|              | J                      | 57 ± 4 | 99 ± 6  | 75 ± 1    | 50 ± 0 | 32 ± 7 | 40 ± 3 | 81 ± 7 | 16 ± 1 | 36 ± 5 | 77 ± 8 | 47 ± 0  | 37 ± 4 | 64 ± 1 | 59 ± 5  | 62 ± 1  | 134 ± 4  | 16 ± 1    | 17 ± 2 |
|              | K                      | 65 ± 0 | 99 ± 6  | 79 ± 10   | 49 ± 1 | 34 ± 3 | 44 ± 4 | 78 ± 0 | 19 ± 3 | 41 ± 2 | 68 ± 1 | 44 ± 1  | 36 ± 3 | 61 ± 3 | 61 ± 12 | 66 ± 3  | 122 ± 2  | 14 ± 2    | 21 ± 7 |
|              | L                      | 65 ± 1 | 104 ± 4 | 66 ± 4    | 53 ± 2 | 36 ± 3 | 46 ± 2 | 76 ± 1 | 19 ± 3 | 37 ± 2 | 67 ± 2 | 41 ± 2  | 38 ± 0 | 66 ± 2 | 70 ± 1  | 64 ± 3  | 120 ± 0  | 14 ± 0    | 17 ± 0 |
|              | M                      | 68 ± 3 | 104 ± 4 | 72 ± 3    | 47 ± 3 | 36 ± 3 | 43 ± 1 | 77 ± 4 | 17 ± 1 | 39 ± 4 | 71 ± 0 | 46 ± 4  | 37 ± 1 | 61 ± 1 | 64 ± 11 | 58 ± 11 | 124 ± 9  | 16 ± 2    | 20 ± 0 |
|              |                        |        | ala     | asp + asn | arg    | gly    | his    | ile    | leu    | me t   | phe    | pro     | ser    | thr    | val     | lys     | tyr      | glu + gln | trp    |
|              | Entomo<br>logy<br>code |        |         |           |        |        |        |        |        |        |        |         |        |        |         |         |          |           |        |
| AUTUMN GROUP | A                      | 64 ± 2 | 83 ± 1  | 82 ± 12   | 59 ± 4 | 41 ± 2 | 44 ± 2 | 83 ± 3 | 21 ± 2 | 51 ± 3 | 73 ± 2 | 50 ± 9  | 40 ± 8 | 66 ± 3 | 55 ± 7  | 76 ± 0  | 87 ± 2   | 19 ± 0    | 23 ± 1 |
|              | B                      | 68 ± 3 | 91 ± 8  | 77 ± 3    | 61 ± 1 | 42 ± 5 | 44 ± 1 | 77 ± 3 | 20 ± 0 | 50 ± 1 | 74 ± 3 | 56 ± 2  | 42 ± 4 | 66 ± 2 | 47 ± 1  | 73 ± 2  | 90 ± 4   | 16 ± 2    | 21 ± 3 |
|              | C                      | 64 ± 1 | 94 ± 3  | 77 ± 6    | 57 ± 2 | 38 ± 3 | 45 ± 0 | 81 ± 1 | 20 ± 2 | 48 ± 6 | 69 ± 5 | 58 ± 4  | 42 ± 5 | 68 ± 1 | 66 ± 8  | 68 ± 8  | 86 ± 1   | 14 ± 2    | 17 ± 1 |
|              | D                      | 68 ± 2 | 79 ± 11 | 86 ± 10   | 61 ± 7 | 37 ± 1 | 44 ± 2 | 78 ± 5 | 20 ± 1 | 49 ± 5 | 81 ± 6 | 48 ± 8  | 37 ± 2 | 64 ± 3 | 47 ± 6  | 78 ± 5  | 97 ± 14  | 17 ± 0    | 24 ± 2 |
|              | E                      | 66 ± 2 | 89 ± 4  | 78 ± 5    | 58 ± 6 | 39 ± 4 | 48 ± 2 | 81 ± 3 | 19 ± 1 | 48 ± 4 | 76 ± 3 | 55 ± 2  | 40 ± 2 | 67 ± 2 | 50 ± 11 | 71 ± 7  | 90 ± 1   | 13 ± 5    | 21 ± 0 |
|              | F                      | 69 ± 3 | 95 ± 9  | 68 ± 6    | 55 ± 2 | 35 ± 2 | 48 ± 1 | 89 ± 3 | 19 ± 1 | 42 ± 1 | 69 ± 1 | 56 ± 5  | 43 ± 4 | 69 ± 2 | 63 ± 8  | 62 ± 4  | 96 ± 6   | 13 ± 1    | 15 ± 0 |
|              | G                      | 62 ± 5 | 89 ± 5  | 75 ± 8    | 57 ± 4 | 38 ± 4 | 50 ± 1 | 79 ± 1 | 18 ± 2 | 44 ± 2 | 77 ± 4 | 51 ± 4  | 40 ± 2 | 67 ± 4 | 51 ± 4  | 69 ± 6  | 101 ± 10 | 15 ± 1    | 19 ± 2 |
|              | H                      | 63 ± 2 | 95 ± 26 | 83 ± 13   | 55 ± 2 | 42 ± 2 | 42 ± 2 | 73 ± 1 | 20 ± 0 | 46 ± 1 | 72 ± 2 | 56 ± 11 | 37 ± 2 | 61 ± 1 | 54 ± 5  | 70 ± 3  | 102 ± 2  | 16 ± 1    | 21 ± 3 |
|              | I                      | 68 ± 2 | 93 ± 2  | 73 ± 6    | 56 ± 1 | 40 ± 2 | 47 ± 1 | 84 ± 1 | 19 ± 1 | 46 ± 3 | 70 ± 0 | 55 ± 6  | 43 ± 1 | 67 ± 3 | 55 ± 6  | 67 ± 1  | 88 ± 2   | 15 ± 1    | 18 ± 0 |
|              | J                      | 66 ± 4 | 85 ± 4  | 80 ± 3    | 55 ± 2 | 35 ± 1 | 43 ± 3 | 74 ± 1 | 18 ± 1 | 43 ± 2 | 79 ± 1 | 49 ± 3  | 35 ± 1 | 59 ± 2 | 60 ± 10 | 72 ± 1  | 113 ± 0  | 18 ± 1    | 23 ± 1 |
|              | K                      | 76 ± 7 | 99 ± 2  | 70 ± 6    | 53 ± 1 | 37 ± 2 | 45 ± 2 | 79 ± 1 | 18 ± 0 | 43 ± 2 | 68 ± 1 | 53 ± 0  | 44 ± 8 | 66 ± 0 | 59 ± 7  | 60 ± 1  | 102 ± 6  | 15 ± 1    | 19 ± 1 |
|              | L                      | 64 ± 5 | 76 ± 8  | 88 ± 7    | 55 ± 2 | 39 ± 2 | 42 ± 1 | 73 ± 1 | 19 ± 2 | 48 ± 5 | 81 ± 3 | 46 ± 1  | 38 ± 2 | 64 ± 2 | 51 ± 9  | 70 ± 6  | 107 ± 1  | 18 ± 0    | 26 ± 2 |
|              | M                      | 65 ± 1 | 83 ± 16 | 73 ± 6    | 62 ± 6 | 40 ± 2 | 49 ± 4 | 86 ± 2 | 18 ± 2 | 46 ± 4 | 76 ± 4 | 55 ± 0  | 44 ± 3 | 72 ± 0 | 49 ± 9  | 71 ± 6  | 87 ± 11  | 14 ± 1    | 17 ± 0 |
|              | N                      | 65 ± 3 | 85 ± 13 | 77 ± 11   | 57 ± 3 | 43 ± 7 | 43 ± 1 | 79 ± 5 | 19 ± 0 | 47 ± 3 | 73 ± 1 | 55 ± 5  | 42 ± 6 | 67 ± 1 | 56 ± 5  | 69 ± 1  | 92 ± 3   | 16 ± 2    | 20 ± 1 |
|              | O                      | 68 ± 2 | 89 ± 11 | 73 ± 5    | 58 ± 4 | 40 ± 3 | 46 ± 1 | 80 ± 2 | 18 ± 1 | 47 ± 1 | 74 ± 2 | 54 ± 4  | 42 ± 1 | 69 ± 0 | 51 ± 1  | 68 ± 2  | 88 ± 1   | 17 ± 2    | 18 ± 1 |
|              |                        |        |         |           |        |        |        |        |        |        |        |         |        |        |         |         |          |           |        |

|         |                        |           |              |           |           |           |           |           |           |           |           |           |           |           |           |           |              |           |           |
|---------|------------------------|-----------|--------------|-----------|-----------|-----------|-----------|-----------|-----------|-----------|-----------|-----------|-----------|-----------|-----------|-----------|--------------|-----------|-----------|
|         |                        |           |              |           |           |           |           |           |           |           |           |           |           |           |           |           |              |           |           |
|         |                        | ala       | asp +<br>asn | arg       | gly       | his       | ile       | leu       | me<br>t   | phe       | pro       | ser       | thr       | val       | lys       | tyr       | glu +<br>gln | trp       | cys       |
| CONTROL | Entomo<br>logy<br>code |           |              |           |           |           |           |           |           |           |           |           |           |           |           |           |              |           |           |
|         | CTR                    | 66 ±<br>2 | 99 ±<br>9    | 77 ±<br>9 | 51 ±<br>1 | 37 ±<br>1 | 44<br>± 2 | 74<br>± 4 | 18<br>± 0 | 43 ±<br>3 | 69<br>± 0 | 47 ±<br>2 | 39<br>± 0 | 62<br>± 3 | 62 ±<br>6 | 64 ±<br>3 | 109 ±<br>5   | 18<br>± 2 | 21<br>± 3 |

Table S3: PCA loadings.

|     | PC1   | PC2   | PC3   | PC4   | PC5   |
|-----|-------|-------|-------|-------|-------|
| glu | -0,94 | -0,14 | -0,01 | -0,20 | 0,04  |
| lys | -0,90 | 0,16  | 0,08  | 0,19  | -0,13 |
| phe | 0,86  | -0,08 | -0,34 | 0,08  | 0,03  |
| asp | -0,84 | 0,33  | -0,30 | 0,05  | 0,09  |
| tyr | 0,82  | -0,31 | -0,23 | -0,07 | -0,11 |
| gly | 0,80  | 0,23  | -0,18 | -0,30 | 0,26  |
| val | 0,67  | 0,53  | 0,30  | 0,02  | 0,07  |
| ser | 0,62  | 0,46  | -0,30 | -0,17 | -0,19 |
| his | 0,52  | -0,36 | 0,23  | 0,31  | -0,48 |
| cys | 0,22  | -0,82 | 0,22  | 0,08  | 0,06  |
| arg | 0,38  | -0,76 | -0,16 | -0,01 | -0,13 |
| thr | 0,43  | 0,62  | -0,39 | 0,22  | -0,14 |
| trp | 0,14  | -0,53 | 0,00  | 0,47  | 0,50  |
| leu | 0,54  | 0,15  | 0,67  | 0,15  | -0,22 |
| met | 0,54  | 0,05  | -0,60 | 0,33  | 0,23  |
| ile | 0,47  | 0,45  | 0,50  | 0,15  | 0,03  |
| pro | 0,50  | -0,24 | 0,25  | -0,70 | 0,20  |
| ala | 0,17  | 0,30  | 0,48  | 0,18  | 0,50  |

**Table S4.** Summary of ANOVA results.

| Response | Transformation | Significant factors other than linear factors                                                                                                                                                                                                                                                                                                                                  | R <sup>2</sup> | Pred R <sup>2</sup> |
|----------|----------------|--------------------------------------------------------------------------------------------------------------------------------------------------------------------------------------------------------------------------------------------------------------------------------------------------------------------------------------------------------------------------------|----------------|---------------------|
| his      | None           | Ashes*Fibres*Carbohydrates<br>Ashes*Fibres<br>Ashes*Carbohydrates<br>Fibres*Carbohydrates<br><br>= 115,1251 * Lipids + 142,8697 * Ashes + 38,8390 * Fibres - 1685,9516 * Polyphenols + 43,4625 * Proteins + 39,3171 * Carbohydrates -250,6740 * Ashes * Fibres -272,3182 * Ashes * Carbohydrates - 9,7396 * Fibres * Carbohydrates + 506,4663 * Ashes * Fibres * Carbohydrates | 0.39           | 0.25                |
| ile      | None           | Ashes* Proteins<br><br>= 74,8870 * Lipids - 40,7818 *Ashes + 43,3120 * Fibres -1796,7832 * Polyphenols+ 37,9499 * Proteins + 46,5295 * Carbohydrates + 972,5378 *Ashes * Proteins                                                                                                                                                                                              | 0.42           | 0.34                |
| leu      | Power (k=2.5)  | None<br><br>= 138,8949 * Lipids + 56,4144 * Ashes + 67,6174 * Fibres + 1404,0497 * Polyphenols + 128,6415 * Proteins + 68,7274 * Carbohydrates                                                                                                                                                                                                                                 | 0.76           | 0.73                |
| met      | None           | None<br><br>= -0,1543 * Lipids + 8,1371 * Ashes + 22,8876 * Fibres -1975,3666 * Polyphenols + 15,3176 * Proteins + 19,1364 * Carbohydrates                                                                                                                                                                                                                                     | 0.38           | 0.30                |
| phe      | None           | Lipids*Fibres<br><br>= -40,2706 * Lipids + 20,9231 * Ashes + 44,2497 * Fibres - 8333,6909 * Polyphenols + 51,8682 * Proteins + 46,1981 * Carbohydrates + 371,7611 * Lipids * Fibres                                                                                                                                                                                            | 0.51           | 0.44                |
| thr      | None           | None<br><br>= 20,2967 * Lipids + 29,0736 * Ashes + 39,5218 * Fibres -3503,6628 * Polyphenols + 59,5214 * Proteins + 40,8414 * Carbohydrates                                                                                                                                                                                                                                    | 0.47           | 0.41                |
| val      | None           | Lipids * Carbohydrates<br>Polyphenols * Proteins<br><br>= 207,4451 * Lipids + 38,1122 * Ashes + 60,6184 * Fibres -11825,8780 * Polyphenols + 74,0273 * Proteins + 66,4548 * Carbohydrates -304,7381 * Lipids * Carbohydrates + 75299,2771 *Polyphenols * Proteins                                                                                                              | 0.68           | 0.62                |
| lys      | Power (k=2.5)  | Lipids * Ashes * Polyphenols<br>Lipids * Ashes<br>Lipids * Polyphenols<br>Lipids * Carbohydrates<br>Ashes * Polyphenols                                                                                                                                                                                                                                                        | 0.63           | 0.52                |

-789,5534 \* Lipids + 67,3562 \* Ashes + 63,5633 \* Fibres + 5323,1377 \* Polyphenols +  
65,4436 \* Proteins + 56,3629 \* Carbohydrates + 3172,7599 \* Lipids \* Ashes + 244403,0963  
\* Lipids \* Polyphenols - 455,9764 \* Lipids \* Carbohydrates + 18499,4861 \* Ashes \*  
Polyphenols + 4911650,4178 \* Lipids \* Ashes \* Polyphenols

---

|      |                        |      |      |
|------|------------------------|------|------|
| None | Polyphenols * Proteins | 0.19 | 0.08 |
|------|------------------------|------|------|

trp

= 21,8816 \* Lipids + 11,1148 \* Ashes + 16,4850 \* Fibres + 7629,3982 \* Polyphenols +  
23,4770 \* Proteins + 11,7696 \* Carbohydrates -71645,1372 \* Polyphenols \* Proteins

---



---
